# Supplementary material
Source: publisher site journal article supplement (https://www.dovepress.com/article/supplementary_file/618603/618603%20Supplementary%20Material.docx)
Supplement: Supplementary file 1 [file 618603%20Supplementary%20Material.docx]

**Supplementary Table S1. Missing Data Summary of Study Variables (N = 351)**

| Variable | Valid (N) | Missing (N) | Missing (%) |
| --- | --- | --- | --- |
| Age | 351 | 0 | 0 |
| Height | 351 | 0 | 0 |
| Weight | 351 | 0 | 0 |
| BMI | 351 | 0 | 0 |
| Gestational age | 351 | 0 | 0 |
| Prior HG/NVP history | 351 | 0 | 0 |
| Education level | 351 | 0 | 0 |
| Occupation | 351 | 0 | 0 |
| Smoking status | 351 | 0 | 0 |
| Partner smoking | 351 | 0 | 0 |
| Household income | 351 | 0 | 0 |
| Living arrangement | 351 | 0 | 0 |
| PUQE | 351 | 0 | 0 |
| SAS | 351 | 0 | 0 |
| SDS | 351 | 0 | 0 |
| Na | 339 | 12 | 3.4 |
| K | 311 | 40 | 11.4 |
| Cl | 339 | 12 | 3.4 |
| Ca | 335 | 16 | 4.6 |
| Mg | 336 | 15 | 4.3 |
| Phosphorus | 338 | 13 | 3.7 |
| Fe | 334 | 17 | 4.8 |
| Zn | 349 | 2 | 0.6 |
| Vitamin B1 | 347 | 4 | 1.1 |
| PL | 345 | 6 | 1.7 |
| PLP | 349 | 2 | 0.6 |
| Vitamin B12 | 346 | 5 | 1.4 |
| AST | 340 | 11 | 3.1 |
| ALT | 339 | 12 | 3.4 |
| ALP | 338 | 13 | 3.7 |
| CREA | 338 | 13 | 3.7 |
| Urea | 339 | 12 | 3.4 |
| 5-HT | 348 | 3 | 0.9 |

**Supplementary Table S2. Results of Model Validation and Comparative Analyses**

The λ.min model achieved an apparent AUC of 0.717 (95% CI: 0.711–0.727), which was slightly higher than that of the λ.1se model (AUC = 0.701, 95% CI: 0.691–0.714). However, the difference in discrimination was not statistically significant according to DeLong’s test (*P* = 0.244). Bootstrap internal validation further showed comparable corrected AUCs between the two models (0.648 vs. 0.651). Considering the overall discriminatory performance, the number of retained variables, and the clinical relevance to the objectives of the present study, the λ.min model was selected for subsequent analyses.

Supplementary Table S2. Bootstrap internal validation summary (λ.min vs λ.1se)

| Model | Apparent AUC | 95%CI (L) | 95%CI (U) | OOB AUC Mean | OOB AUC SD | OOB AUC 2.5% | OOB AUC 50% | OOB AUC 97.5% | Optimism | Corrected AUC |
| --- | --- | --- | --- | --- | --- | --- | --- | --- | --- | --- |
| λ.min | 0.717 | 0.711 | 0.727 | 0.667 | 0.044 | 0.581 | 0.668 | 0.751 | 0.069 | 0.648 |
| λ.1se | 0.701 | 0.691 | 0.714 | 0.663 | 0.045 | 0.576 | 0.664 | 0.747 | 0.050 | 0.651 |

Note: OOB = out-of-bag; AUC = area under the curve; CI = confidence interval.

**Supplementary Table S3. DeLong’s test (λ.1se vs λ.min)**

| Test | Z | *P* | ΔAUC 95%CI (L) | ΔAUC 95%CI (U) | AUC (λ.1se) | AUC (λ.min) |
| --- | --- | --- | --- | --- | --- | --- |
| DeLong (λ.1se vs λ.min) | -1.18024 | 0.243788 | -0.04490 | 0.01109 | 0.700530 | 0.717436 |

Note: Tests the difference between correlated ROC curves on the same subjects.

**Supplementary Figure S1. Forest plots of multivariable logistic regression results**

Multivariable regression showed that higher K and Fe levels were significantly negatively associated with severe NVP in the ion model. In the full model, Ca and PL were significant positive factors, whereas Fe was a significant negative factor. Most other variables were non-significant.
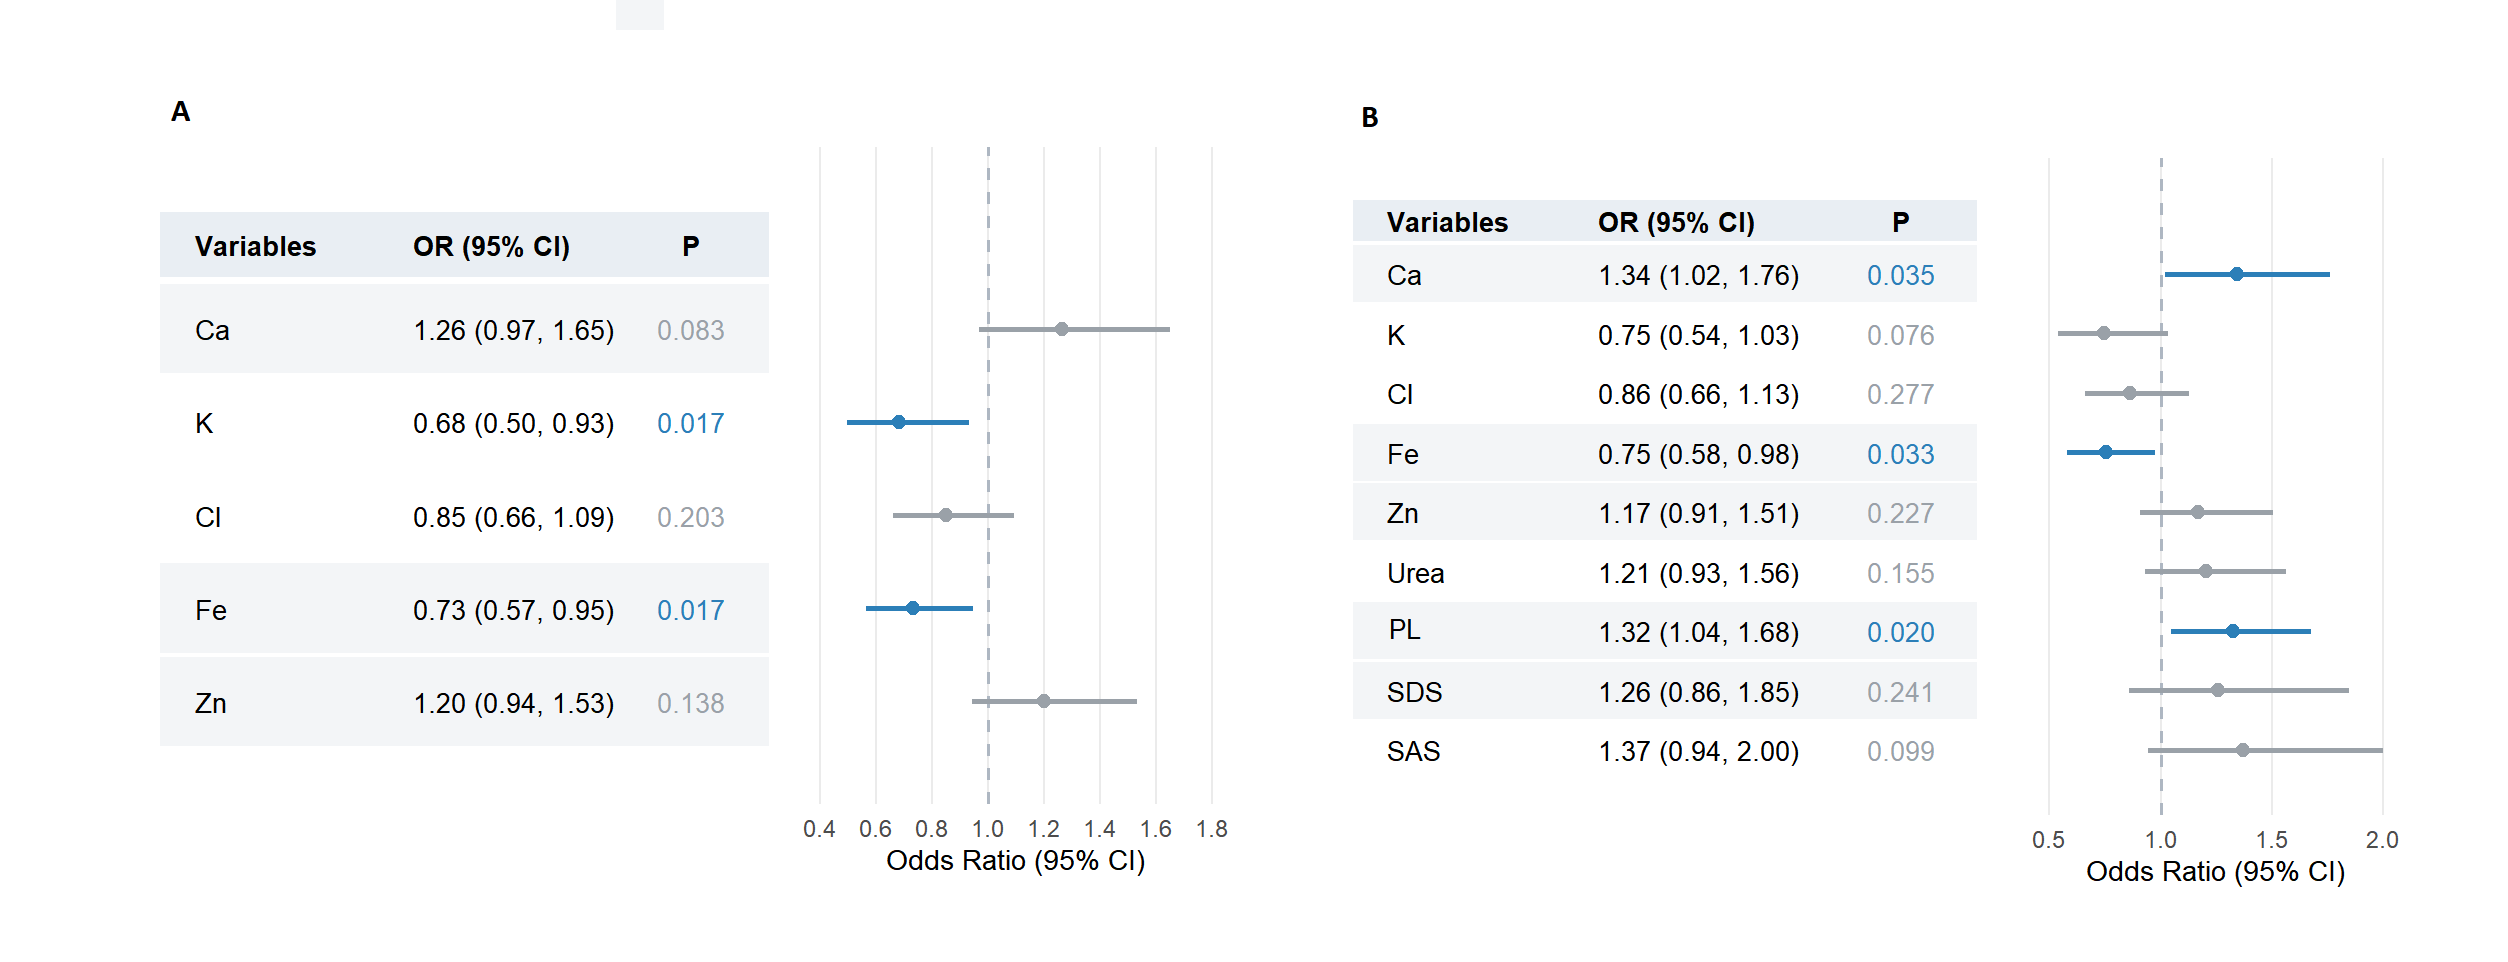


Note: (A) **Model 1**; (B) **Model 2**.
